# Supplementary material for: Profiling of the muscle-specific dystroglycan interactome reveals the role of Hippo signaling in muscular dystrophy and age-dependent muscle atrophy
Source: Springer Nature journal article supplement (doi:10.1186/s12916-019-1478-3), 2020-01-21

**Supplementary Information**  
**Supplementary Tables**

**Supplementary Table 1. Muscle-specific Dg-interacting proteins**

| <b>Gene Symbol</b> | <b>Protein name</b>            | <b>FlyBase ID</b> | <b>Cellular localization</b> | <b>Molecular function</b>                                                         | <b>Human homolog(s)</b>           | <b>Disease association/<br/>Risk factors</b>                                                                                                                   |
|--------------------|--------------------------------|-------------------|------------------------------|-----------------------------------------------------------------------------------|-----------------------------------|----------------------------------------------------------------------------------------------------------------------------------------------------------------|
| <i>Dg</i>          | Dystroglycan                   | FBgn0034072       | Membrane-associated receptor | ECM receptor, Dystrophin-Glycoprotein complex component                           | DAG1                              | Muscular dystrophy-dystroglycanopathy                                                                                                                          |
| <i>Atpa</i>        | Na pump $\alpha$ subunit       | FBgn0002921       | Membrane-associated          | Metal ion binding, ATP binding, Cation transmembrane transporter, ATPase activity | ATP1A1-4                          | Alternating hemiplegia, Dystonia-12, Response to antipsychotic treatment, Migraine                                                                             |
| <i>PMCA</i>        | plasma membrane calcium ATPase | FBgn0259214       | Membrane-associated          | Calcium-transporting ATPase activity, Metal ion binding                           | ATP2B1-4                          | Spinocerebellar ataxia, Deafness, Coronary heart disease, Hypertension                                                                                         |
| <i>nrv</i>         | nervana 1                      | FBgn0015776       | Membrane-associated          | Cation transporter, Protein binding, Sodium:Potassium-exchanging ATPase           | ATP1B1                            | Hypertension                                                                                                                                                   |
| <i>CG10226</i>     | CG10226                        | FBgn0035695       | Membrane-associated          | Drug transmembrane transporter, ATPase activity                                   | ABCB1<br>ABCB4<br>ABCB5<br>ABCB11 | Fasting plasma glucose, Metabolic syndrome, Cholestasis, progressive familial intrahepatic 2, Response to statin therapy, Gallbladder disease 1, Dental caries |
| <i>Vha100-1</i>    | Vha100-1                       | FBgn0028671       | Membrane-associated          | Proton-transporting ATPase                                                        | ATP6V0A1                          | F-cell distribution, Renal tubular acidosis                                                                                                                    |
| <i>LanA</i>        | Laminin A                      | FBgn0002526       | ECM                          | Receptor binding                                                                  | LAMA1-5                           | Colorectal cancer, Amyotrophic lateral sclerosis, Cardiomyopathy, Congenital muscular dystrophy, Type 2 diabetes                                               |
| <i>LanB1</i>       | Laminin B1                     | FBgn0261800       | ECM                          | Receptor binding                                                                  | LAMB1-4                           | Nephrotic syndrome, Pierson syndrome, IgG glycosylation, Ulcerative colitis, Lissencephaly 5, Epidermolysis bullosa                                            |
| <i>LanB2</i>       | Laminin B2                     | FBgn0267348       | ECM                          | Receptor binding                                                                  | LAMC1-3                           | Colorectal cancer, Cortical malformations, Coronary heart disease, Systemic lupus erythematosus, Epidermolysis bullosa                                         |
| <i>Cpr62Bc</i>     | Cpr62Bc                        | FBgn0035281       | ECM                          | Component of chitin-based cuticle                                                 | ZNF160                            | No disease terms found                                                                                                                                         |
| <i>CG34034</i>     | CG34034                        | FBgn0054034       | ECM                          | Unknown (involved in reproduction)                                                | -                                 | -                                                                                                                                                              |

**Supplementary Table 1. Muscle-specific Dg-interacting proteins (continued)**

| <b>Gene Symbol</b>               | <b>Protein name</b>             | <b>FlyBase ID</b> | <b>Cellular localization</b> | <b>Molecular function</b>                                                                             | <b>Human homolog(s)</b>         | <b>Disease association/<br/>Risk factors</b>                                                                             |
|----------------------------------|---------------------------------|-------------------|------------------------------|-------------------------------------------------------------------------------------------------------|---------------------------------|--------------------------------------------------------------------------------------------------------------------------|
| <i>wupA</i>                      | wings up A                      | FBgn0283471       | Cytoskeleton                 | Actin binding,<br>Tropomyosin binding                                                                 | TNNI1-3                         | Cardiomyopathy,<br>Inflammatory bowel disease,<br>Arthrogyrosis                                                          |
| <i>Gel</i>                       | Gelsolin                        | FBgn0010225       | Cytoskeleton                 | Actin binding,<br>Actin filament polymerization,<br>Calcium ion binding                               | GSN                             | Amyloidosis, Finnish type                                                                                                |
| <i>Mlc-c</i>                     | Myosin light chain cytoplasmic  | FBgn0004687       | Cytoskeleton                 | Myosin heavy chain binding,<br>Calcium ion binding,<br>Actin filament-based movement                  | MYL3                            | Cardiomyopathy                                                                                                           |
| <i>MIP21134p</i>                 | Myosin alkali light chain 1     | FBgn0002772       | Cytoskeleton                 | Myosin heavy chain binding<br>Calcium ion binding                                                     | MYL3                            | Cardiomyopathy                                                                                                           |
| <i>Msp300</i>                    | Muscle-specific protein 300 kDa | FBgn0261836       | Cytoskeleton                 | Cytoskeletal protein binding,<br>Actin filament binding,<br>Protein kinase binding                    | SYNE1                           | Autism spectrum disorder,<br>Attention deficit-hyperactivity disorder,<br>Bipolar disorder,<br>Depression, Schizophrenia |
| <i>zip</i>                       | zipper                          | FBgn0265434       | Cytoskeleton                 | Motor activity,<br>ATPase activity,<br>Myosin light chain binding                                     | MYH10<br>MYH9<br>MYH11<br>MYH14 | End-stage renal disease,<br>Glomerulosclerosis,<br>Optic disc size,<br>Deafness,<br>Peripheral neuropathy,<br>Myopathy   |
| <i>Act42A</i>                    | Actin 42A                       | FBgn0000043       | Cytoskeleton                 | Structural constituent of cytoskeleton                                                                | ACTB<br>ACTG1                   | Dystonia, juvenile-onset<br>Deafness<br>Myopathy                                                                         |
| <i>ck</i>                        | crinkled                        | FBgn0000317       | Cytoskeleton                 | Actin binding,<br>Motor activity,<br>Myosin light chain binding,<br>Cadherin binding, ATPase activity | MYO7A                           | Deafness,<br>Usher syndrome                                                                                              |
| <i>sqh</i>                       | spaghetti squash                | FBgn0003514       | Cytoskeleton                 | Myosin heavy chain binding,<br>Calcium ion binding                                                    | MYL12B                          | Antineutrophil cytoplasmic antibody-associated vasculitis                                                                |
| <i>tmod</i>                      | Tropomodulin                    | FBgn0082582       | Cytoskeleton                 | Tropomyosin binding,<br>Actin binding                                                                 | TMOD1                           | Obesity-related traits                                                                                                   |
| <i>TpnC4</i>                     | Troponin C isoform 4            | FBgn0033027       | Cytoskeleton                 | Calcium ion binding                                                                                   | CALM1                           | Ventricular tachycardia                                                                                                  |
| <i>TpnC47D</i>                   | Troponin C at 47D               | FBgn0010423       | Cytoskeleton                 | Calcium ion binding                                                                                   | CALM1                           | Ventricular tachycardia                                                                                                  |
| <i>hts</i>                       | hu li tai shao                  | FBgn0263391       | Cytoskeleton                 | Actin binding                                                                                         | ADD1-3                          | Hypertension,<br>Biliary atresia                                                                                         |
| <i>CG3630</i>                    | CG3630                          | FBgn0023540       | Cytoskeleton                 | Actin binding                                                                                         | ABRA                            | Dental caries                                                                                                            |
| <i><math>\alpha</math>Tub85E</i> | $\alpha$ -Tubulin               | FBgn0003886       | Cytoskeleton                 | Microtubule cytoskeleton component                                                                    | TUBA1A                          | Lissencephaly 3,<br>Distal hereditary motor neuropathy type II                                                           |
| <i>Chd64</i>                     | Chd64                           | FBgn0035499       | Cytoskeleton                 | Actin binding,                                                                                        | TAGLN3                          | No disease terms found                                                                                                   |

**Supplementary Table 1. Muscle-specific Dg-interacting proteins (continued)**

| <b>Gene Symbol</b> | <b>Protein name</b>                          | <b>FlyBase ID</b> | <b>Cellular localization</b> | <b>Molecular function</b>                                                        | <b>Human homolog(s)</b> | <b>Disease association/<br/>Risk factors</b>                                                    |
|--------------------|----------------------------------------------|-------------------|------------------------------|----------------------------------------------------------------------------------|-------------------------|-------------------------------------------------------------------------------------------------|
| <i>S-Lap1</i>      | Sperm-Leucylaminopeptidase 1                 | FBgn0035915       | Cytosol                      | Aminopeptidase, Metalloexopeptidase, Manganese ion binding, Proteolysis          | -                       | -                                                                                               |
| <i>S-Lap2</i>      | Sperm-Leucylaminopeptidase 2                 | FBgn0052351       | Cytosol                      | Aminopeptidase, Metalloexopeptidase, Manganese ion binding, Proteolysis          | LAP3                    | Tumor angiogenesis                                                                              |
| <i>S-Lap4</i>      | Sperm-Leucylaminopeptidase 4                 | FBgn0052064       | Cytosol                      | Aminopeptidase, Metalloexopeptidase activity, Manganese ion binding, Proteolysis | LAP3                    | Tumor angiogenesis                                                                              |
| <i>S-Lap7</i>      | Sperm-Leucylaminopeptidase 4                 | FBgn0033868       | Cytosol                      | Aminopeptidase, Metalloexopeptidase activity, Manganese ion binding, Proteolysis | LAP3                    | Tumor angiogenesis                                                                              |
| <i>Gpo-1</i>       | Glycerophosphate oxidase-1                   | FBgn0022160       | Cytosol                      | Glycerol-3-phosphate dehydrogenase, Calcium ion binding                          | GPD2                    | Type 2 diabetes                                                                                 |
| <i>CG6178</i>      | CG6178                                       | FBgn0039156       | Cytosol                      | Fatty-acyl-CoA synthase, Long-chain fatty acid-CoA ligase                        | ACSM3                   | Hypertension                                                                                    |
| <i>CG10916</i>     | CG10916                                      | FBgn0034312       | Cytosol                      | Zinc ion binding, Ubiquitin-protein transferase                                  | RNF2<br>BRCA1           | Obesity-related traits, Breast-ovarian cancer susceptibility, Pancreatic cancer, susceptibility |
| <i>gcf</i>         | GST-containing FLYWCH zinc-finger protein    | FBgn0250732       | Cytosol                      | Glutathione transferase, Nucleic acid binding, Ras protein signal transduction   | GDAP1                   | Charcot-Marie-Tooth disease                                                                     |
| <i>CG33303</i>     | CG33303                                      | FBgn0053303       | Cytosol                      | Protein N-linked cocsylation                                                     | RPN1                    | No disease terms found                                                                          |
| <i>CG7970</i>      | CG7970                                       | FBgn0035252       | Cytosol                      | -                                                                                | PXMP2                   | No disease terms found                                                                          |
| <i>eIF4E1</i>      | eukaryotic translation initiation factor 4E1 | FBgn0015218       | Cytosol                      | Translation initiation factor activity, RNA cap binding                          | EIF4E                   | Autism 19, Pervasive developmental disorder                                                     |
| <i>CG4115</i>      | CG4115                                       | FBgn0038017       | Cytosol                      | Carbohydrate binding                                                             | -                       | -                                                                                               |
| <i>Clect27</i>     | C-type lectin 27kD                           | FBgn0031629       | Cytosol                      | Carbohydrate binding                                                             | -                       | -                                                                                               |
| <i>loopin-1</i>    | loopin-1                                     | FBgn0259795       | Cytosol                      | Aminopeptidase, metalloexopeptidase                                              | LAP3                    | Tumor angiogenesis                                                                              |
| <i>kibra</i>       | kibra ortholog                               | FBgn0262127       | Cytosol, Membrane            | Protein binding                                                                  | WWC1-3                  | Periodontal microbiota, Memory, Height                                                          |
| <i>CG5554</i>      | CG5554                                       | FBgn0034914       | Cytosol                      | Protein disulfide isomerase activity                                             | TMX1                    | No disease terms found                                                                          |

**Supplementary Table 1. Muscle-specific Dg-interacting proteins (continued)**

| <b>Gene Symbol</b>   | <b>Protein name</b>                     | <b>FlyBase ID</b> | <b>Cellular localization</b>      | <b>Molecular function</b>                                                | <b>Human homologs</b>   | <b>Disease association/<br/>Risk factors</b>                              |
|----------------------|-----------------------------------------|-------------------|-----------------------------------|--------------------------------------------------------------------------|-------------------------|---------------------------------------------------------------------------|
| <i>RpS27A</i>        | Ribosomal protein S27A                  | FBgn0003942       | Cytosol                           | Structural constituent of ribosome                                       | RpS27A                  | Inclusion body myositis                                                   |
| <i>RpS10b</i>        | Ribosomal protein S10b                  | FBgn0285947       | Cytosol                           | Structural constituent of ribosome                                       | RPS10                   | Diamond-Blackfan Anemia                                                   |
| <i>Cyt-b5</i>        | Cytochrome b5                           | FBgn0264294       | Cytosol                           | Electron carrier, Heme binding                                           | CYB5A                   | Methemoglobinemia, type IV                                                |
| <i>Sar1</i>          | Sar1 ortholog (S. cerevisiae)           | FBgn0038947       | Cytosol, Cytoplasmic vesicles, ER | GTPase activity, GTP binding, Scaffold protein binding                   | SAR1B                   | Chylomicron retention disease                                             |
| <i>Rab7 (CG5915)</i> | Rab7 (CG5915)                           | FBgn0015795       | Cytosol, Cytoplasmic vesicles, ER | Small GTPase, GTPase activity, GTP binding                               | RAB7A                   | Charcot-Marie-Tooth disease, type 2B                                      |
| <i>Rab18</i>         | Rab18                                   | FBgn0015794       | Cytosol, Cytoplasmic vesicles, ER | Small GTPase, GTPase activity, GTP binding                               | RAB18                   | Warburg Micro Syndrome                                                    |
| <i>Surf4</i>         | Surfeit 4                               | FBgn0019925       | Cytosol, Cytoplasmic vesicles, ER | unknown                                                                  | SURF4                   | No disease terms found                                                    |
| <i>CG33303</i>       | CG33303                                 | FBgn0053303       | Cytosol, ER                       | Protein N-linked glycosylation                                           | RPN1                    | No disease terms found                                                    |
| <i>Pmp70</i>         | Peroxisomal Membrane Protein            | FBgn0031069       | Cytosol, Membrane                 | ATPase activity ABC transporter type                                     | ABCD3                   | Bile acid synthesis defect, Zellweger Syndrome                            |
| <i>Flo-1</i>         | Flotillin 1                             | FBgn0024754       | Cytosol, Membrane                 | Structural molecule activity, homologs regulate endocytosis              | FLOT2                   | No disease terms found                                                    |
| <i>Rpt1</i>          | Regulatory particle triple-A ATPase 1   | FBgn0028687       | Nucleus                           | ATPase activity, Proteasome 26S subunit component                        | PSMC2<br>PSMC5<br>PSMC6 | Osteosarcoma                                                              |
| <i>His4</i>          | Histone H4                              | FBgn0001200       | Nucleus                           | Heterodimerization, DNA binding, Chromatin assembly/disassembly          | -                       | -                                                                         |
| <i>His2A</i>         | Histone H2A                             | FBgn0001196       | Nucleus                           | Heterodimerization, DNA binding, Chromatin assembly/disassembly          | H2AFV                   | No disease terms found                                                    |
| <i>His2B</i>         | Histone H2B                             | FBgn0001198       | Nucleus                           | Heterodimerization, DNA binding, Chromatin assembly/disassembly          | -                       | -                                                                         |
| <i>His2Av</i>        | Histone H2A variant                     | FBgn0001197       | Nucleus                           | Heterodimerization, DNA binding, Chromatin assembly/disassembly          | H2AFV<br>H2AFZ          | No disease terms found                                                    |
| <i>yki</i>           | yorkie                                  | FBgn0034970       | Nucleus                           | Transcription factor binding, Protein binding, Transcription coactivator | YAP1                    | MRI atrophy measures, Polycystic ovary syndrome, Pubertal anthropometrics |
| <i>baf</i>           | barrier to autointegration factor       | FBgn0031977       | Nucleus                           | DNA binding                                                              | BANF1                   | Nestor-Guillermo progeria syndrome                                        |
| <i>ben</i>           | bendless                                | FBgn0000173       | Nucleus                           | Ubiquitin conjugating enzyme                                             | UBE2N                   | Parkinson's disease                                                       |
| <i>SMC1</i>          | Structural maintenance of chromosomes 1 | FBgn0040283       | Nucleus                           | Chromatin binding, DNA binding, ATP binding, Heterodimerization, Cohesin | SMC1A                   | Cornelia de Lange syndrome 2                                              |

**Supplementary Table 1. Muscle-specific Dg-interacting proteins (continued)**

| <b>Gene Symbol</b> | <b>Protein name</b>                                   | <b>FlyBase ID</b> | <b>Cellular localization</b> | <b>Molecular function</b>                                                                        | <b>Human homolog(s)</b> | <b>Disease association/<br/>Risk factors</b> |
|--------------------|-------------------------------------------------------|-------------------|------------------------------|--------------------------------------------------------------------------------------------------|-------------------------|----------------------------------------------|
| <i>mRpS11</i>      | mitochondrial ribosomal protein S11                   | FBgn0038474       | Mitochondria                 | Structural constituent of ribosome                                                               | MRPS11                  | No disease terms found                       |
| <i>CG40042</i>     | Tim23, Translocase of inner mitochondrial membrane 23 | FBgn0267976       | Mitochondria                 | Mitochondrial inner membrane translocase subunit<br>Tim17/Tim22/Tim23/ peroxisomal protein PMP24 | TIMM23                  | No disease terms found                       |
| <i>CG32230</i>     | ND-MLRQ, NADH dehydrogenase (ubiquinone) MLRQ subunit | FBgn0052230       | Mitochondria                 | NADH dehydrogenase activity, Mitochondrial electron transport, NADH to ubiquinone                | NDUFA4                  | No disease terms found                       |
| <i>Tim17b</i>      | Tim17b                                                | FBgn0263977       | Mitochondria                 | Protein targeting to mitochondria                                                                | TIMM17B                 | No disease terms found                       |
| <i>CG12400</i>     | ND-B14.5B, NADH dehydrogenase B14.5 B subunit         | FBgn0031505       | Mitochondria                 | NADH dehydrogenase, Mitochondrial electron transport                                             | NDUFC2                  | No disease terms found                       |
| <i>ox</i>          | oxen                                                  | FBgn0011227       | Mitochondria                 | Ubiquinol-cytochrome-c reductase                                                                 | UQCRC1                  | No disease terms found                       |
| <i>ScsβG</i>       | Succinyl-coenzyme A synthetase β subunit              | FBgn0029118       | Mitochondria                 | Succinate-CoA ligase (GDP-forming)                                                               | SUCLG2                  | No disease terms found                       |
| <i>ttm50</i>       | tiny tim 50                                           | FBgn0250874       | Mitochondria                 | Protein tyrosine phosphatase                                                                     | TIMM50                  | No disease terms found                       |
| <i>CG14095</i>     | CG14095                                               | FBgn0036870       | unknown                      | unknown                                                                                          | -                       | -                                            |
| <i>CG34205</i>     | CG34205                                               | FBgn0085234       | unknown                      | unknown                                                                                          | POU2AF1                 | No disease terms found                       |
| <i>CG34461</i>     | CG34461                                               | FBgn0250833       | unknown                      | unknown                                                                                          | ZNF160                  | No disease terms found                       |
| <i>CG10373</i>     | Jwa ortholog                                          | FBgn0032704       | unknown                      | unknown                                                                                          | ARL6IP5                 | No disease terms found                       |
| <i>CG5676</i>      | CG5676                                                | FBgn0032200       | unknown                      | unknown                                                                                          | FUNDC1-2                | Personality dimensions                       |
| <i>CG42323</i>     | CG42323                                               | FBgn0259223       | unknown                      | unknown                                                                                          | -                       | -                                            |
| <i>CG6055</i>      | CG6055                                                | FBgn0031918       | unknown                      | C-type lectin                                                                                    | CLEC3B                  | Inflammatory Diseases                        |
| <i>CG13047</i>     | CG13047                                               | FBgn0036594       | unknown                      | unknown                                                                                          | -                       | -                                            |
| <i>mv</i>          | mauve                                                 | FBgn0265988       | unknown                      | unknown                                                                                          | LYST                    | Chediak-Higashi syndrome                     |
| <i>CG13335</i>     | CG42807                                               | FBgn0261989       | unknown                      | unknown                                                                                          | -                       | -                                            |
| <i>CG14946</i>     | CG14946                                               | FBgn0032405       | unknown                      | unknown                                                                                          | HSD17B11                | Cutaneous T-cell lymphoma                    |
| <i>CG10527</i>     | CG10527                                               | FBgn0034583       | unknown                      | Farnesoic acid O-methyl-transferase                                                              | -                       | -                                            |
| <i>CG1572</i>      | CG1572                                                | FBgn0030309       | unknown                      | unknown                                                                                          | MARVELD1                | Facial paralysis, Facial nerve disease       |
| <i>CG13392</i>     | CG13392                                               | FBgn0032033       | unknown                      | unknown                                                                                          | TMEM126A<br>TMEM126B    | Height, Optic atrophy-7                      |
| <i>CG4972</i>      | CG4972                                                | FBgn0032217       | unknown                      | unknown                                                                                          | NCLN                    | Hirschsprung Disease 1                       |

**Supplementary Table 2. Pathway enrichment in muscle-specific Dg-interacting components**

| <b>KEGG Pathway ID</b> | <b>Pathway description</b> | <b>Count in gene set</b> | <b>Gene names</b>                              | <b>False discovery rate</b> |
|------------------------|----------------------------|--------------------------|------------------------------------------------|-----------------------------|
| 04512                  | ECM Receptor interaction   | 4                        | Dg<br>LanA<br>LanB1<br>LanB2                   | $4.25 \times 10^{-5}$       |
| 00480                  | Glutathione metabolism     | 5                        | Gfzf<br>S-Lap1<br>S-Lap2<br>S-Lap4<br>Loopin-1 | 0.0214                      |
| 00190                  | Oxidative phosphorylation  | 4                        | CG32230<br>CG12400<br>Vha100-1<br>Vha100-2     | 0.0365                      |

**Supplementary Table 3. Human disease association enrichment analysis**

| <b>Disease ID</b> | <b>Disease Categories</b>   | <b>Count in gene set</b> | <b>P-value</b>         |
|-------------------|-----------------------------|--------------------------|------------------------|
| MESH:D009369      | Cancer                      | 26                       | $2.52 \times 10^{-11}$ |
| MESH:D005767      | Digestive system disease    | 13                       | $2.11 \times 10^{-8}$  |
| MESH:D002318      | Cardiovascular disease      | 14                       | $5.88 \times 10^{-8}$  |
| MESH:D052801      | Urogenital disease (male)   | 14                       | $3.05 \times 10^{-8}$  |
| MESH:D052776      | Urogenital disease (female) | 12                       | $2.69 \times 10^{-8}$  |

**Supplementary Table 4. Dg interacts with the Hippo pathway causing age-dependent muscle degeneration**

| Age        | Genotype                                                  | Muscle degeneration             |                                   |                                | Statistics <sup>2</sup>                                     |                                                                            |                                                                                              | Total analyzed muscles <sup>3</sup> |
|------------|-----------------------------------------------------------|---------------------------------|-----------------------------------|--------------------------------|-------------------------------------------------------------|----------------------------------------------------------------------------|----------------------------------------------------------------------------------------------|-------------------------------------|
|            |                                                           | Strong, % (AVE±SD) <sup>1</sup> | Moderate, % (AVE±SD) <sup>1</sup> | Total, % (AVE±SD) <sup>1</sup> | Muscle degeneration compared to <i>w<sup>1118/+</sup></i>   | Muscle degeneration compared to 7 day old                                  | Genetic interaction                                                                          |                                     |
| 7-day old  | <i>w<sup>1118/+</sup></i>                                 | 0.99±0.38                       | 9.94±3.45                         | 10.93±3.32                     | -                                                           | -                                                                          | -                                                                                            | n=399                               |
|            | <i>Dg<sup>O55/+</sup></i>                                 | 1.22±0.40                       | 10.77±1.25                        | 11.93±1.43                     | <sup>a</sup> p=0.053<br><sup>b</sup> p=0.642                | -                                                                          | -                                                                                            | n=410                               |
|            | <i>yki<sup>B5/+</sup></i>                                 | 0.87±0.35                       | 10.73±1.41                        | 11.60±1.37                     | <sup>a</sup> p=0.702<br><sup>b</sup> p=0.763                | -                                                                          | -                                                                                            | n=458                               |
|            | <i>kbr<sup>del/+</sup></i>                                | 0.39±0.34                       | 11.39±0.45                        | 11.78±0.45                     | <sup>a</sup> p=0.114<br><sup>b</sup> p=0.684                | -                                                                          | -                                                                                            | n=492                               |
|            | <i>Dg<sup>O55/yki<sup>B5</sup></sup></i>                  | 0.89±0.33                       | 8.07±1.69                         | 8.96±1.97                      | <sup>a</sup> p=0.744<br><sup>b</sup> p=0.425                | -                                                                          | -                                                                                            | n=444                               |
|            | <i>Dg<sup>O55/+</sup>,<br/><i>kbr<sup>del/+</sup></i></i> | 0.73±0.72                       | 10.72±1.33                        | 11.44±1.24                     | <sup>a</sup> p=0.602<br><sup>b</sup> p=0.815                | -                                                                          | -                                                                                            | n=429                               |
|            | <i>Mhc&gt;Dg<sup>RNAi</sup></i>                           | 4.25±6.25                       | 5.83±1.44                         | 10.09±7.20                     | <sup>a</sup> p=0.429                                        | -                                                                          | -                                                                                            | n=423                               |
|            | <i>Mhc&gt;yki<sup>RNAi</sup></i>                          | 0.68±0.68                       | 17.65±6.16                        | 18.32±5.49                     | <sup>a</sup> p=0.246                                        | -                                                                          | -                                                                                            | n=232                               |
| 28-day old | <i>w<sup>1118/+</sup></i>                                 | 2.68±0.16                       | 17.48±1.45                        | 20.16±1.57                     | -                                                           | <sup>a</sup> p=0.002<br><sup>b</sup> p=0.012                               | -                                                                                            | n=414                               |
|            | <i>Dg<sup>O55/+</sup></i>                                 | 7.78±1.86                       | 25.39±0.68                        | 33.19±1.32                     | <sup>a</sup> p=0.009<br><sup>b</sup> p=3.9x10 <sup>-4</sup> | <sup>a</sup> p=0.002<br><sup>b</sup> p=4.6x10 <sup>-5</sup>                | -                                                                                            | n=408                               |
|            | <i>yki<sup>B5/+</sup></i>                                 | 7.11±0.28                       | 19.47±1.89                        | 26.58±2.16                     | <sup>a</sup> p=1.9x10 <sup>-5</sup><br><sup>b</sup> p=0.014 | <sup>a</sup> p=1.8x10 <sup>-5</sup><br><sup>b</sup> p=5.4x10 <sup>-4</sup> | -                                                                                            | n=436                               |
|            | <i>kbr<sup>del/+</sup></i>                                | 6.82±1.72                       | 25.98±1.55                        | 32.80±1.32                     | <sup>a</sup> p=0.014<br><sup>b</sup> p=4.4x10 <sup>-4</sup> | <sup>a</sup> p=0.003<br><sup>b</sup> p=1.3x10 <sup>-5</sup>                | -                                                                                            | n=439                               |
|            | <i>Dg<sup>O55/yki<sup>B5</sup></sup></i>                  | 6.07±1.66                       | 17.06±0.47                        | 23.14±1.69                     | <sup>a</sup> p=0.024<br><sup>b</sup> p=0.089                | <sup>a</sup> p=0.006<br><sup>b</sup> p=7.0x10 <sup>-4</sup>                | <sup>c</sup> p=0.298<br><sup>d</sup> p=0.001<br><sup>e</sup> p=0.349<br><sup>f</sup> p=0.096 | n=346                               |
|            | <i>Dg<sup>O55/+</sup>,<br/><i>kbr<sup>del/+</sup></i></i> | 11.55±2.07                      | 38.34±5.20                        | 49.90±4.05                     | <sup>a</sup> p=0.002<br><sup>b</sup> p=2.9x10 <sup>-4</sup> | <sup>a</sup> p=0.001<br><sup>b</sup> p=9.5x10 <sup>-5</sup>                | <sup>c</sup> p=0.079<br><sup>d</sup> p=0.002<br><sup>g</sup> p=0.038<br><sup>h</sup> p=0.002 | n=438                               |
|            | <i>Mhc&gt;Dg<sup>RNAi</sup></i>                           | 10.65±5.80                      | 8.38±6.79                         | 19.03±12.08                    | <sup>a</sup> p=0.032                                        | -                                                                          | -                                                                                            | n=484                               |
|            | <i>Mhc&gt;yki<sup>RNAi</sup></i>                          | 15.85±9.15                      | 8.15±2.56                         | 24.09±11.71                    | <sup>a</sup> p=0.045                                        | -                                                                          | -                                                                                            | n=319                               |

<sup>1</sup>Average and SD are determined from 3 biological replicates; <sup>2</sup>Two-tailed Student's t-test was applied for statistical analysis; <sup>3</sup>in every biological replicate 105-168 muscles were analyzed; <sup>a</sup>statistical analysis of strong muscle degeneration phenotype; <sup>b</sup>statistical analysis of total muscle degeneration phenotype; <sup>c</sup>comparison of strong muscle degeneration phenotype to *Dg<sup>O55/+</sup>*; <sup>d</sup>comparison of total muscle degeneration phenotype to *Dg<sup>O55/+</sup>*; <sup>e</sup>comparison of strong muscle degeneration phenotype to *yki<sup>B5/+</sup>*; <sup>f</sup>comparison of total muscle degeneration phenotype to *yki<sup>B5/+</sup>*; <sup>g</sup>comparison of strong muscle degeneration phenotype to *kbr<sup>del/+</sup>*; <sup>h</sup>comparison of total muscle degeneration phenotype to *kbr<sup>del/+</sup>*

**Supplementary Table 5. Dg and Hippo pathway regulate muscle size during ageing**

| Genotype                         | Age              | Muscle # | Muscle size, (AVE±AD) <sup>1</sup> μ m <sup>2</sup> | Analyzed muscles, n | Correlation area, ρ | Average of relative muscle size, (AVE±AD) <sup>1</sup> | Average muscle atrophy (AVE±AD) <sup>1</sup> % | p-value <sup>2</sup>   |
|----------------------------------|------------------|----------|-----------------------------------------------------|---------------------|---------------------|--------------------------------------------------------|------------------------------------------------|------------------------|
| <i>Mhc-Gal4/+</i>                | Young 7-day old, | 1-2      | 2503.4±91.9                                         | 30                  | 0.98                | 1.00±0.00                                              | 0.0±3.8                                        | -                      |
|                                  |                  | 3-4      | 3225.0±73.8                                         | 36                  |                     |                                                        |                                                |                        |
|                                  |                  | 5-6      | 3038.7±130.6                                        | 36                  |                     |                                                        |                                                |                        |
|                                  |                  | 7-8      | 3003.6±70.6                                         | 34                  |                     |                                                        |                                                |                        |
|                                  |                  | 9-10     | 2425.6±117.9                                        | 31                  |                     |                                                        |                                                |                        |
|                                  |                  | 11-12    | 2132.8±118.8                                        | 28                  |                     |                                                        |                                                |                        |
|                                  | Aged, 28-day old | 1-2      | 2229.1±58.9                                         | 68                  |                     |                                                        |                                                |                        |
|                                  |                  | 3-4      | 2949.9±50.0                                         | 70                  |                     |                                                        |                                                |                        |
|                                  |                  | 5-6      | 2773.8±82.3                                         | 70                  |                     |                                                        |                                                |                        |
|                                  |                  | 7-8      | 2841.2±68.4                                         | 68                  |                     |                                                        |                                                |                        |
|                                  |                  | 9-10     | 2305.6±63.3                                         | 62                  |                     |                                                        |                                                |                        |
|                                  |                  | 11-12    | 2101.1±83.8                                         | 32                  |                     |                                                        |                                                |                        |
| <i>Mhc&gt;Dg<sup>RM/i</sup></i>  | Young 7-day old, | 1-2      | 2071.9±108.9                                        | 36                  | 0.98                | 0.81±0.04                                              | 18.6±3.7                                       | <sup>3</sup> p=3.4E-12 |
|                                  |                  | 3-4      | 2364.9±43.4                                         | 46                  |                     |                                                        |                                                |                        |
|                                  |                  | 5-6      | 2516.6±16.3                                         | 46                  |                     |                                                        |                                                |                        |
|                                  |                  | 7-8      | 2531.6±22.8                                         | 46                  |                     |                                                        |                                                |                        |
|                                  |                  | 9-10     | 1895.3±25.7                                         | 45                  |                     |                                                        |                                                |                        |
|                                  |                  | 11-12    | 1851.0±54.8                                         | 36                  |                     |                                                        |                                                |                        |
|                                  | Aged, 28-day old | 1-2      | 1762.5±81.4                                         | 61                  |                     |                                                        |                                                |                        |
|                                  |                  | 3-4      | 2198.3±66.3                                         | 68                  |                     |                                                        |                                                |                        |
|                                  |                  | 5-6      | 2340.1±137.8                                        | 65                  |                     |                                                        |                                                |                        |
|                                  |                  | 7-8      | 2373.1±140.3                                        | 64                  |                     |                                                        |                                                |                        |
|                                  |                  | 9-10     | 1782.0±127.4                                        | 53                  |                     |                                                        |                                                |                        |
|                                  |                  | 11-12    | 1649.0±65.3                                         | 29                  |                     |                                                        |                                                |                        |
| <i>Mhc&gt;ykt<sup>RM/i</sup></i> | Young 7-day old, | 1-2      | 1584.2±233.9                                        | 22                  | 0.93                | 0.58±0.03                                              | 42.4±3.2                                       | <sup>3</sup> p=2.4E-21 |
|                                  |                  | 3-4      | 1726.9±302.3                                        | 22                  |                     |                                                        |                                                |                        |
|                                  |                  | 5-6      | 1730.7±250.0                                        | 22                  |                     |                                                        |                                                |                        |
|                                  |                  | 7-8      | 1931.2±370.0                                        | 22                  |                     |                                                        |                                                |                        |
|                                  |                  | 9-10     | 1452.5±189.9                                        | 22                  |                     |                                                        |                                                |                        |
|                                  |                  | 11-12    | 1276.3±249.3                                        | 22                  |                     |                                                        |                                                |                        |
|                                  | Aged, 28-day old | 1-2      | 1187.5±229.3                                        | 22                  |                     |                                                        |                                                |                        |
|                                  |                  | 3-4      | 1467.6±294.7                                        | 21                  |                     |                                                        |                                                |                        |
|                                  |                  | 5-6      | 1527.8±255.8                                        | 18                  |                     |                                                        |                                                |                        |
|                                  |                  | 7-8      | 1523.3±273.3                                        | 16                  |                     |                                                        |                                                |                        |
|                                  |                  | 9-10     | 1128.7±307.5                                        | 20                  |                     |                                                        |                                                |                        |
|                                  |                  | 11-12    | 937.6±150.8                                         | 18                  |                     |                                                        |                                                |                        |



**Supplementary Table 5. Dg and Hippo pathway regulate muscle size during ageing (continued)**

| Genotype                         | Age              | Muscle # | Muscle size, (AVE±AD) <sup>1</sup> μ m <sup>2</sup> | Analyzed muscles, n | Correlation area, ρ | Average of relative muscle size, (AVE±AD) <sup>1</sup> | Average muscle atrophy (AVE±AD) <sup>1</sup> % | p-value <sup>2</sup>   |
|----------------------------------|------------------|----------|-----------------------------------------------------|---------------------|---------------------|--------------------------------------------------------|------------------------------------------------|------------------------|
| <i>Mhc&gt;kbr</i>                | Young 7-day old, | 1-2      | 2364.0±86.3                                         | 60                  | 0.98                | 0.93±0.04                                              | 6.6±4.0                                        | <sup>3</sup> p=0.00010 |
|                                  |                  | 3-4      | 2907.3±63.2                                         | 65                  |                     |                                                        |                                                |                        |
|                                  |                  | 5-6      | 2848.7±44.7                                         | 65                  |                     |                                                        |                                                |                        |
|                                  |                  | 7-8      | 2935.5±29.6                                         | 64                  |                     |                                                        |                                                |                        |
|                                  |                  | 9-10     | 2078.2±32.5                                         | 65                  |                     |                                                        |                                                |                        |
|                                  | Aged, 28-day old | 1-2      | 2070.0±98.9                                         | 61                  |                     |                                                        |                                                |                        |
|                                  |                  | 3-4      | 2546.1±90.3                                         | 64                  |                     |                                                        |                                                |                        |
|                                  |                  | 5-6      | 2580.1±84.9                                         | 64                  |                     |                                                        |                                                |                        |
|                                  |                  | 7-8      | 2699.3±99.4                                         | 64                  |                     |                                                        |                                                |                        |
|                                  |                  | 9-10     | 1949.4±87.4                                         | 63                  |                     |                                                        |                                                |                        |
| <i>Mhc&gt;yki</i>                | Young 7-day old, | 1-2      | 2501.5±46.4                                         | 42                  | 0.99                | 0.98±0.05                                              | 1.9±4.5                                        | <sup>3</sup> p=0.2667  |
|                                  |                  | 3-4      | 2953.7±54.6                                         | 51                  |                     |                                                        |                                                |                        |
|                                  |                  | 5-6      | 3039.7±41.4                                         | 52                  |                     |                                                        |                                                |                        |
|                                  |                  | 7-8      | 3005.8±57.9                                         | 52                  |                     |                                                        |                                                |                        |
|                                  |                  | 9-10     | 2203.9±25.1                                         | 51                  |                     |                                                        |                                                |                        |
|                                  | Aged, 28-day old | 1-2      | 2282.7±70.4                                         | 56                  |                     |                                                        |                                                |                        |
|                                  |                  | 3-4      | 2762.0±154.2                                        | 69                  |                     |                                                        |                                                |                        |
|                                  |                  | 5-6      | 2837.7±171.0                                        | 71                  |                     |                                                        |                                                |                        |
|                                  |                  | 7-8      | 2814.5±129.5                                        | 71                  |                     |                                                        |                                                |                        |
|                                  |                  | 9-10     | 2050.8±59.1                                         | 69                  |                     |                                                        |                                                |                        |
| <i>Mhc&gt;kbr<sup>RN4i</sup></i> | Young 7-day old, | 1-2      | 2519.3±61.9                                         | 48                  | 0.97                | 0.98±0.04                                              | 1.6±4.0                                        | <sup>3</sup> p=0.2538  |
|                                  |                  | 3-4      | 3067.4±62.8                                         | 69                  |                     |                                                        |                                                |                        |
|                                  |                  | 5-6      | 3001.2±142.5                                        | 72                  |                     |                                                        |                                                |                        |
|                                  |                  | 7-8      | 3039.5±107.6                                        | 66                  |                     |                                                        |                                                |                        |
|                                  |                  | 9-10     | 2196.9±31.6                                         | 67                  |                     |                                                        |                                                |                        |
|                                  | Aged, 28-day old | 1-2      | 2014.0±107.2                                        | 57                  |                     |                                                        |                                                |                        |
|                                  |                  | 3-4      | 2422.3±99.0                                         | 68                  |                     |                                                        |                                                |                        |
|                                  |                  | 5-6      | 2530.3±133.4                                        | 75                  |                     |                                                        |                                                |                        |
|                                  |                  | 7-8      | 2577.8±113.2                                        | 76                  |                     |                                                        |                                                |                        |
|                                  |                  | 9-10     | 1896.9±86.0                                         | 76                  |                     |                                                        |                                                |                        |
|                                  |                  | 11-12    | 1912.4±91.3                                         | 74                  |                     |                                                        |                                                |                        |

<sup>1</sup> AVE±AD are determined from 3 biological replicates, each having at least 10 flies

<sup>2</sup> Two-tailed Student's t-test was applied for statistical analysis

<sup>3</sup> compared to 7-day old control, <sup>4</sup> compared to 7-day old animals of the same genotype

**Supplementary Table 6. Effect of Dg and Hippo deregulation on muscle size during ageing**

| <b>Genotype</b>                  | <b>Atrophy rate, % (AVE±AD)<sup>1</sup></b> | <b>Pearson correlation</b> | <b>p-value<sup>2</sup></b> | <b>Absolute atrophy, μm<sup>2</sup> (AVE±AD)</b> | <b>Normalized absolute atrophy (AVE±AD)<sup>1</sup></b> | <b>Pearson correlation</b> | <b>p-value<sup>2</sup></b> |
|----------------------------------|---------------------------------------------|----------------------------|----------------------------|--------------------------------------------------|---------------------------------------------------------|----------------------------|----------------------------|
| <i>Mhc-Gal4/+</i>                | 6.91±2.73                                   | -                          | -                          | -188.09±85.11                                    | 1.00±0.45                                               | -                          | -                          |
| <i>Mhc&gt;Dg<sup>RNAi</sup></i>  | 8.51±2.85                                   | 0.265                      | 0.062                      | -187.72±52.91                                    | 1.00±0.28                                               | 0.325                      | 0.495                      |
| <i>Mhc&gt;yki<sup>RNAi</sup></i> | 19.89±5.16                                  | -0.37                      | 5.7xE-05                   | -321.55±70.13                                    | 1.71±0.37                                               | -0.23                      | 0.005                      |
| <i>Mhc&gt;kbr</i>                | 14.37±2.33                                  | 0.827                      | 1.6xE-08                   | -364.83±83.90                                    | 1.94±0.45                                               | 0.855                      | 1.3xE-07                   |
| <i>Mhc&gt;yki</i>                | 6.59±1.94                                   | 0.420                      | 0.452                      | -175.35±52.65                                    | 0.93±0.28                                               | 0.540                      | 0.306                      |
| <i>Mhc&gt;kbr<sup>RNAi</sup></i> | 16.73±2.86                                  | 0.762                      | 5.3xE-09                   | -447.13±98.15                                    | 2.38±0.52                                               | 0.822                      | 3.7xE-08                   |

<sup>1</sup> AVE±AD are determined from all 12 muscles in each fly from 3 biological replicates each having at least 10 flies

<sup>2</sup> one-tailed Student's t-test was applied for statistical analysis.

## Supplementary Figure Legends

### Supplementary Figure 1. Dystroglycan co-localizes with cytoskeletal proteins in muscles and associates with the WW domain protein Kbr

**A**, Images showing protein expression patterns in larval body wall muscles for Dg in wildtype and Dg loss-of-function mutant (*Dg<sup>O55</sup>*). **B**, Images showing protein expression patterns in larval body wall muscles for Dg and other cytoskeletal components such as Hts, WupA, and TpnC25D. Images are maximum intensity projections of multiple z-sections, allowing to better visualize muscle cell surface. Hts is enriched and co-localizes with Dg in NMJs, while WupA and TpnC25D co-localize with Dg in stripes. **C**, Co-immunoprecipitation of Hts with *Dg::GFP* analyzed via Western blotting using specific antibodies against Hts (Adducin). **D**, Images showing co-staining of anti-Dg and Hts, or WupA in rectal ampulla muscles. Dg and Hts co-localize at the muscle cell membrane, while Dg and WupA are located together at the membrane sites and in stripes. **E**, Images showing protein expression patterns in hindgut muscles for Dg and Hts, or WupA. Images show cross-section of hindgut muscles cells. Dg – red, Hts, WupA, TpnC25D– green, DAPI – blue. Expression patterns for Dg and Hts, WupA, and TpnC25D are shown in separate channels.

### Supplementary Figure 2. Kibra protein expression in muscles

**A-C**, Kibra protein expression pattern detected by anti-Kibra antibodies in wild type muscles of larval body wall (**A**), adult rectal ampulla (**B**), and adult hindgut (**C**). **D**, Kibra protein expression pattern is detected by anti-Kbr antibodies in larval body wall muscles of animals that overexpress GFP-tagged Dg with the muscle driver (*mhc>Dg-GFP*). Dg-GFP expression is marked by green, Kibra by magenta, and Kibra and Dg co-localization by white rectangles. Kibra – magenta, DAPI – green (**A-D**), GFP (Dg)–green (**D**). Expression patterns for Dg and Kibra are shown in separate channels (**D**). Scale bar 10µm. **E-F**, The membrane-tagged GFP (*UAS-CD8::GFP*) and the full-length Dg tagged with GFP (*UAS-Dg::GFP*) are overexpressed using the muscle-specific *MHC-Gal4* driver to test the possibility of non-specific interaction between GFP and identified Dg interacting partners. **E**, Co-immunoprecipitation of Kbr with *Dg::GFP* using GFP-Trap beads. The presence of Kibra and *Dg::GFP* in the immune-complex is detected by western blotting using specific antibodies against Kibra and GFP. **F**, Immunoblotting with anti-GFP antibodies on the whole animal extracts, recognizes overexpression of GFP-tagged proteins: CD8::GFP and *Dg::GFP*, accordingly to the genotypes (*MHC>GFP* and *MHC>Dg::GFP*). Importantly, immunoblotting with anti-Kibra antibody

demonstrates that Kibra is detected only in *MHC>Dg::GFP* sample. Together, these data confirm the specificity of interaction between Kibra and Dg, and not Kibra and GFP.

### **Supplementary Figure 3. Yorkie protein expression in muscles**

**A-C**, Expression pattern of Yki protein that is endogenously tagged by GFP in larval body wall muscles (**A**), adult rectal ampulla (**B**) and adult hindgut muscles (**C**). Yellow arrows point to gut muscles cells. (**D**) Co-localization of Yki (Yki::GFP) and Dg in larval body wall muscles. Yki::GFP expression is marked by green, Dg by red, and Yki and Dg co-localization by yellow rectangles, DAPI – blue. Expression patterns for Dg and Yki are shown in separate channels. Scale bar 10  $\mu$ m.

### **Supplementary Figure 4. The Hippo signaling pathway components Kibra and Yorkie are WW domain-containing proteins**

**A**, Protein domain architecture of *Drosophila* Dystrophin, Kibra and Yorkie proteins. Dys protein contains one WW domain, while Kibra and Yorkie possess two, which potentially can bind WW-binding sites at the Dg C-terminus. **B**, Sequence alignment of WW domains of the previously described Dg-binding partner Dystrophin, and newly identified Dg-interacting Hippo pathway components, Kibra and Yorkie. Conserved regions are color-coded.

### **Supplementary Figure 5. Deregulation of Yorkie or Kibra affects muscle size**

**A**, Images of transverse sections of IFMs of 28-day old Control (*Mhc-Gal4/+*) muscles. **B**, Upon Yki downregulation using *Mef2-Gal4* driver (*Mef2>Yki<sup>RNAi</sup>*), flies are born without IFMs. **C**, Upon Yki downregulation using *Mhc-Gal4* driver (*Mhc>Yki<sup>RNAi</sup>*), IFM are formed; however, their size is significantly reduced (Supplementary Table 6). This phenotype is augmented by ageing; compare muscles in 7 day young and 28-day old *Mhc>Yki<sup>RNAi</sup>* flies. **D**, Upon Kbr downregulation using *Mhc-Gal4* driver (*Mhc>Kbr<sup>RNAi</sup>*), the size of IFMs is also notably reduced (Supplementary Table 6).

### **Supplementary Figure 6. Deregulation of the Dg-Hippo signaling cascade affects muscle growth and maintenance**

Box plots show the muscle size distribution in 7-day young and 28-day old controls and mutants with muscle-specific up- and downregulation of *Dg*, *yki* and *kbr*. Numbers correspond to muscle pairs (see Figure 5).

Supplementary Figures

Supplementary Figure 1

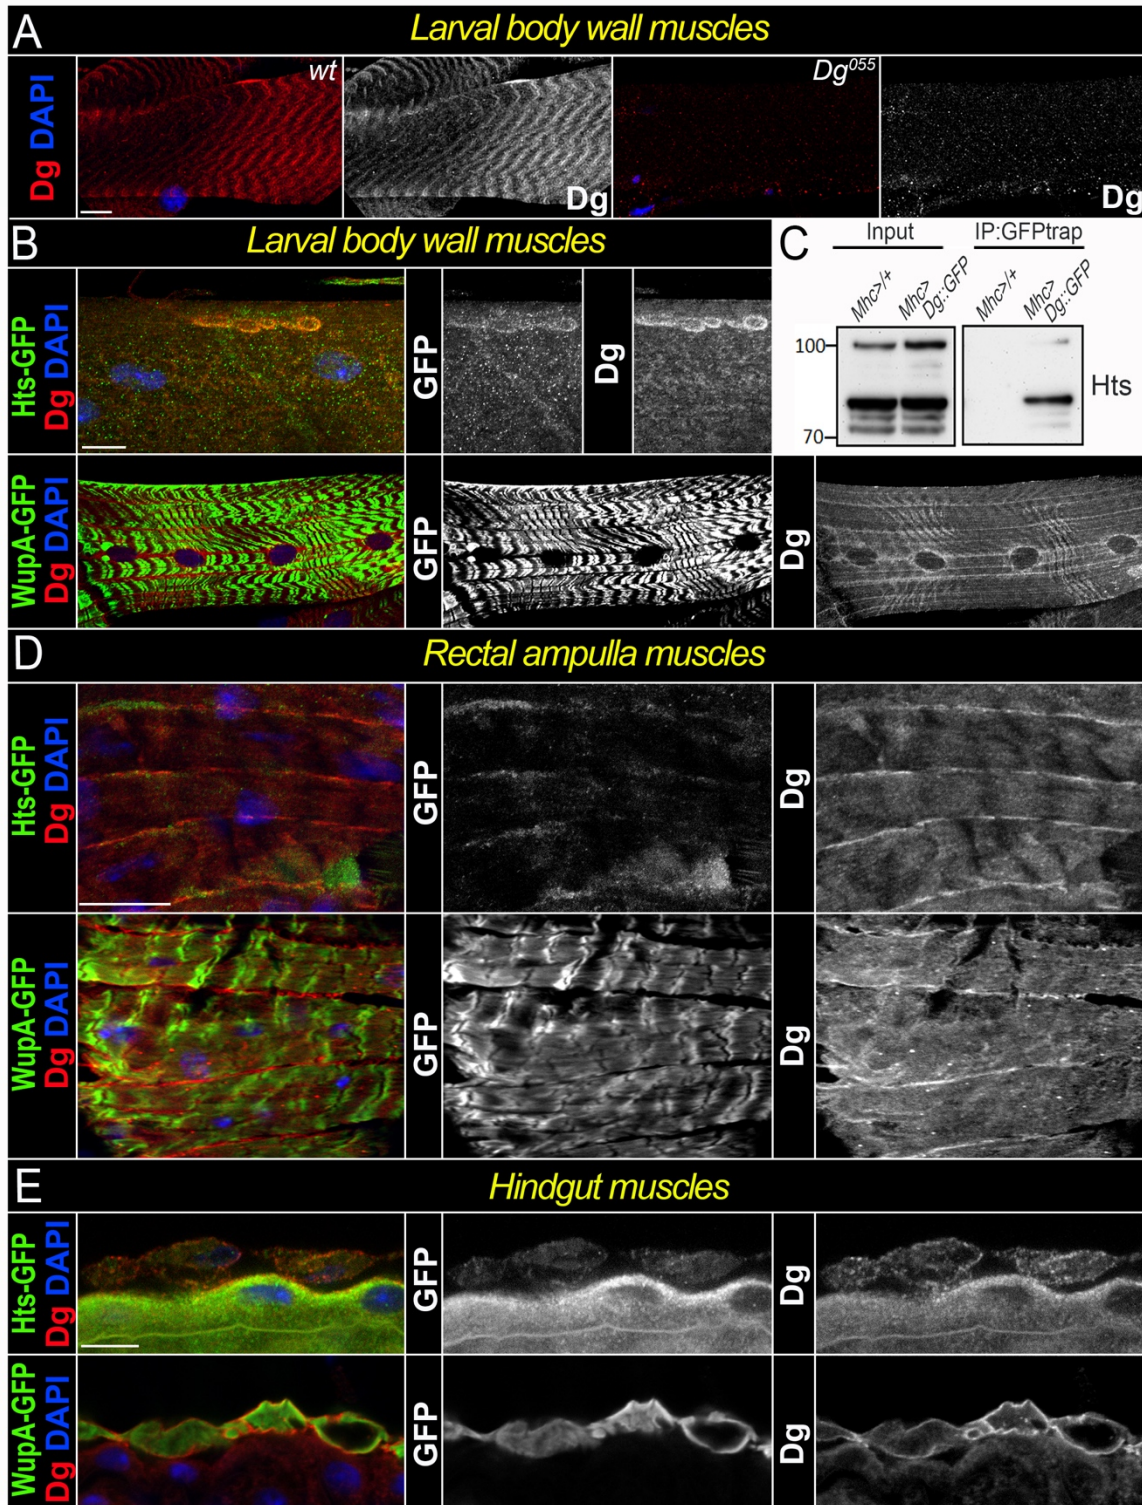

Supplementary Figure 2

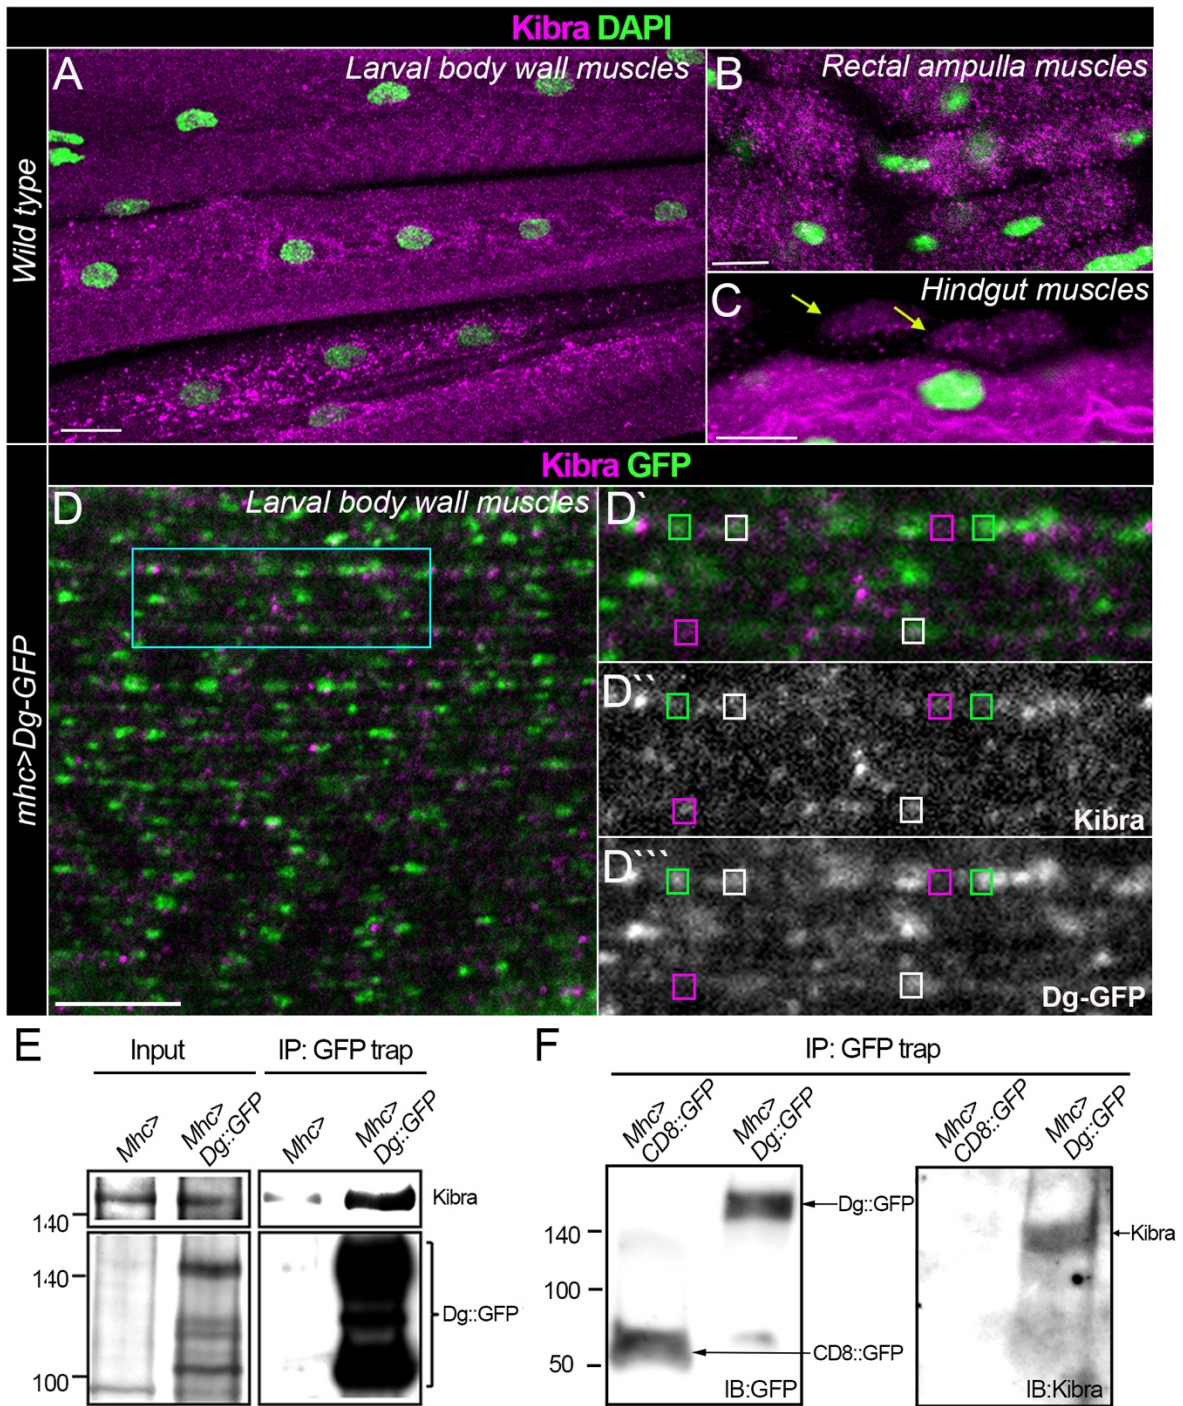

Supplementary Figure 3

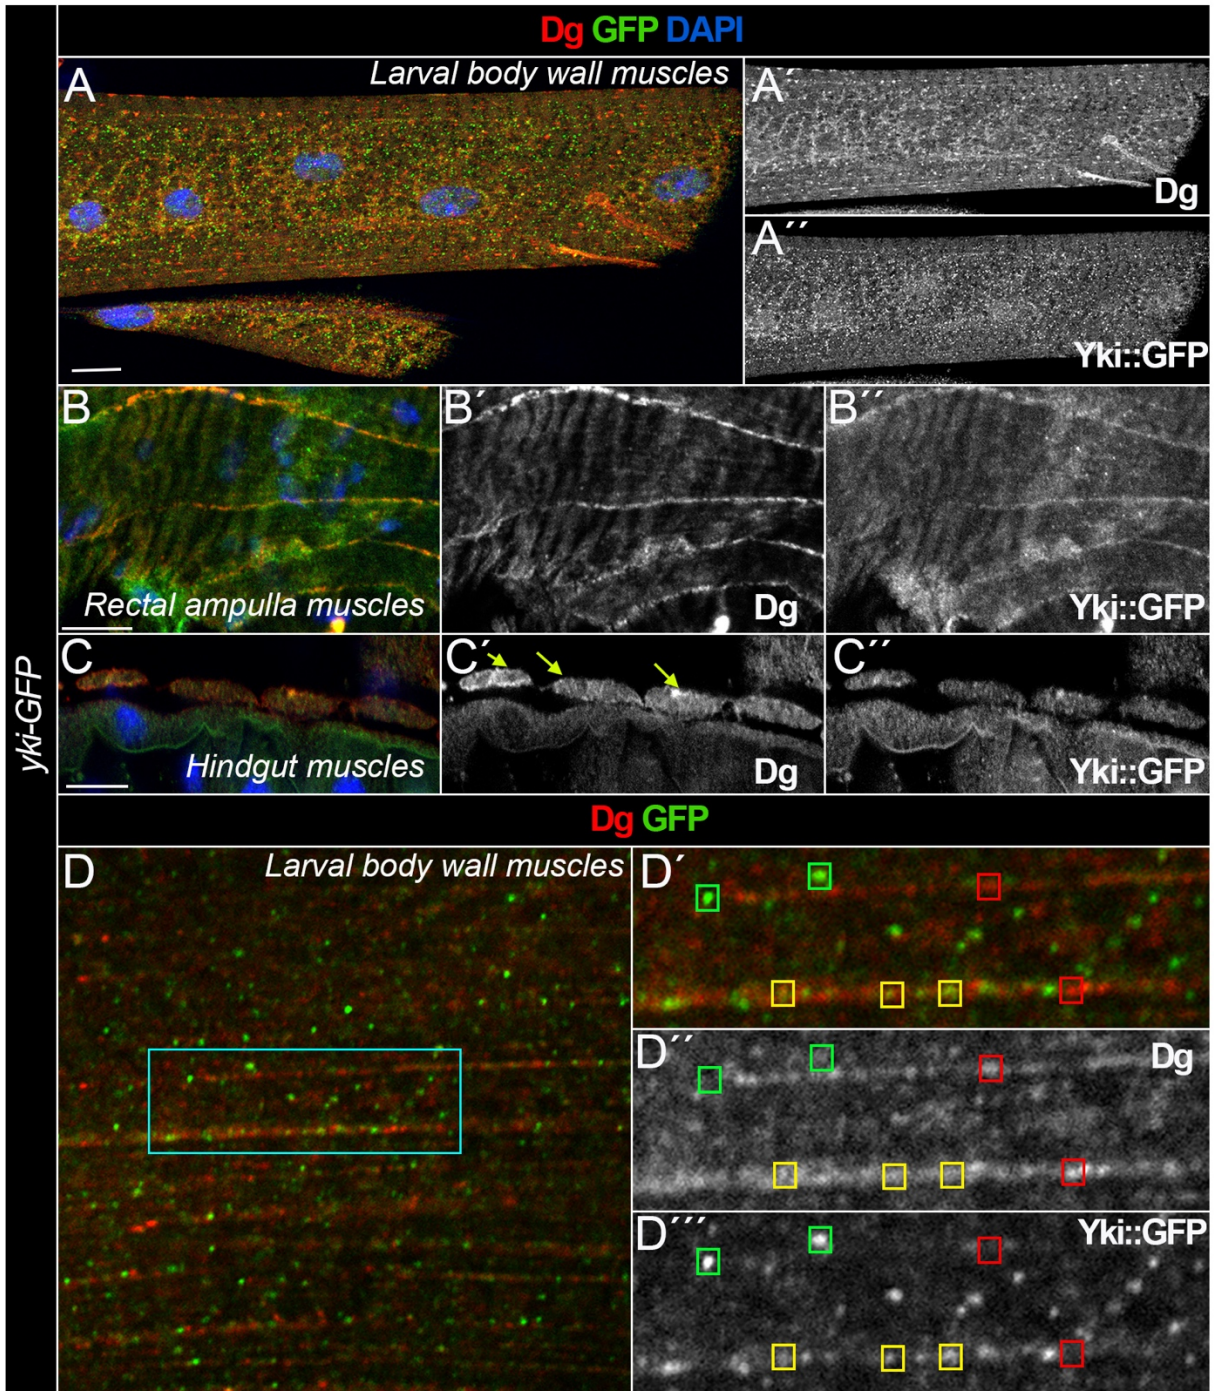

Supplementary Figure 4

A *Drosophila* Dystrophin protein domain architecture

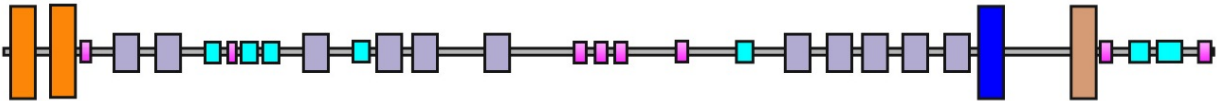

*Drosophila* Kibra protein domain architecture

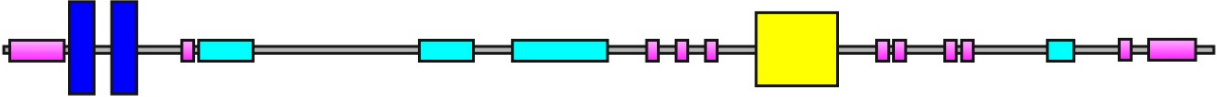

*Drosophila* Yorkie protein domain architecture

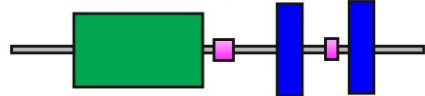

- WW
- C2
- PDB
- Coiled coil
- Low complexity sequence
- Spectrin repeats
- CH (actin binding)
- ZZ

B Unconserved 0 1 2 3 4 5 6 7 8 9 10 Conserved

|               |   |   |   |   |   |   |   |   |   |   |   |   |   |   |   |   |   |   |   |   |   |   |   |   |   |   |   |   |   |   |   |   |   |
|---------------|---|---|---|---|---|---|---|---|---|---|---|---|---|---|---|---|---|---|---|---|---|---|---|---|---|---|---|---|---|---|---|---|---|
| Dystrophin WW | S | V | K | P | W | E | R | A | T | T | A | A | N | V | P | Y | Y | I | D | H | E | R | E | T | T | H | W | D | H | P | E | M |   |
| Kibra WW1     | P | L | P | D | G | W | D | I | A | K | D | F | D | G | K | T | Y | Y | I | D | H | I | N | K | K | T | T | W | L | D | P | R | D |
| Yorkie WW1    | A | L | P | G | W | E | Q | A | K | T | N | D | G | Q | I | Y | Y | L | N | H | T | T | K | S | T | Q | W | E | D | P | R | I |   |
| Kibra WW2     | P | L | P | D | G | W | E | Q | A | V | T | E | S | G | D | L | Y | F | I | N | H | I | D | R | T | T | S | W | N | D | P | R | M |
| Yorkie WW2    | E | L | P | M | G | W | E | E | S | Y | D | P | N | I | G | P | Y | Y | I | N | H | L | A | Q | S | T | Q | L | E | D | P | R | Q |
|               | 4 | 8 | 7 | 3 | 6 | * | 8 | 4 | 8 | 3 | 5 | 2 | 4 | 4 | 2 | 3 | * | 8 | 9 | 7 | * | 4 | 3 | 6 | 5 | * | 4 | 6 | 3 | 7 | * | 7 | 3 |



Supplementary Figure 5

Control (7d)

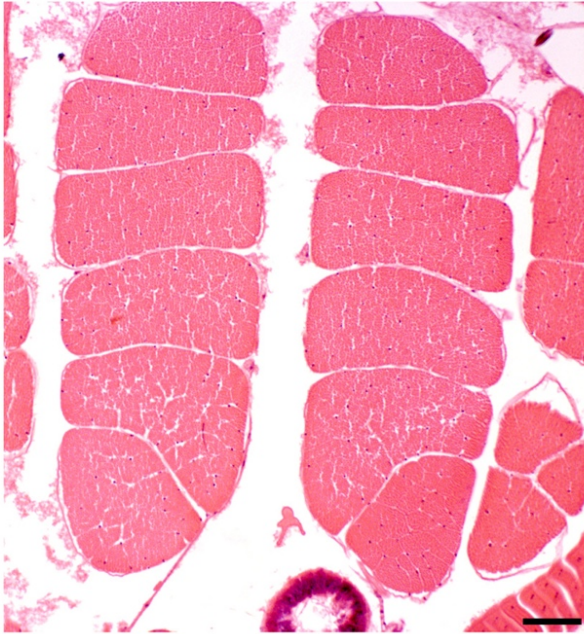

*Mhc>yki<sup>RNAi</sup>* (7d)

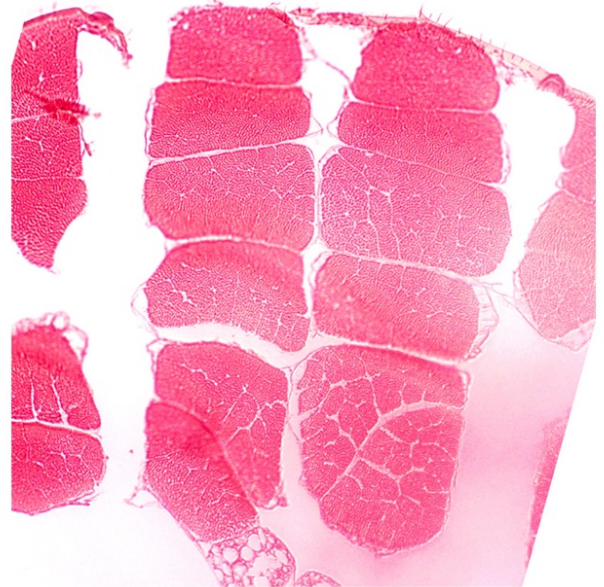

*Mhc>yki<sup>RNAi</sup>* (28d)

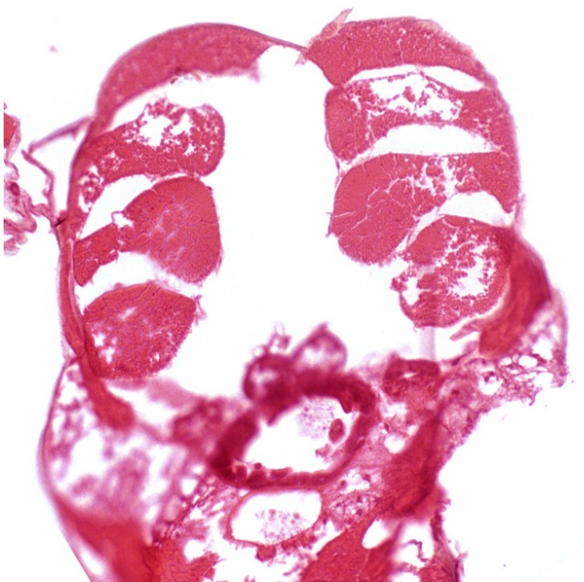

*mef2>yki<sup>RNAi</sup>* (7d)

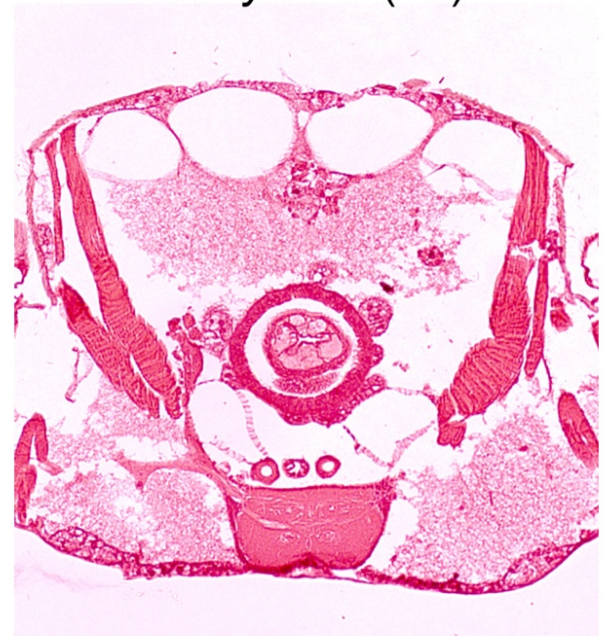

### Supplementary Figure 6

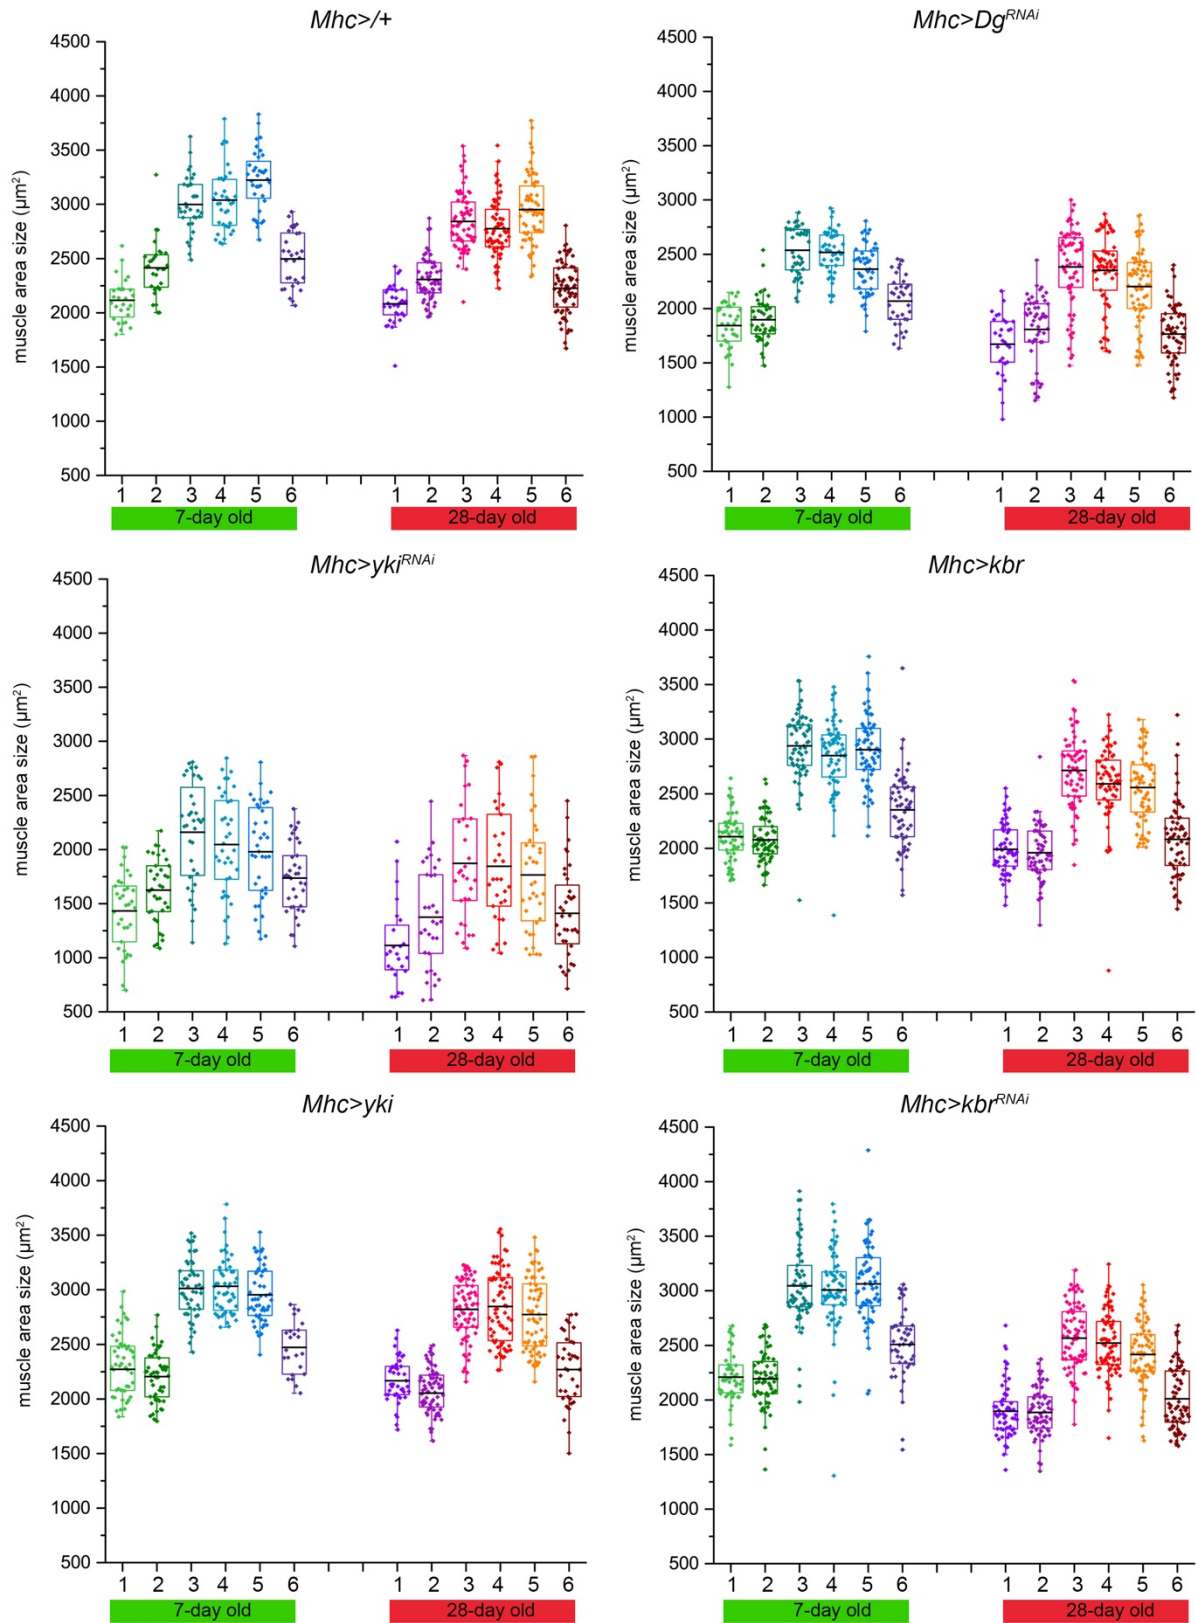

Supplement: MOESM2 [file 12916_2019_1478_MOESM2_ESM.pdf]
